# Supplementary material for: The Imidazoquinoline Toll-Like Receptor-7/8 Agonist Hybrid-2 Potently Induces Cytokine Production by Human Newborn and Adult Leukocytes
Source: PubMed Central journal article supplement (PMC4537157; doi:10.1371/journal.pone.0134640), 2015-08-14
Supplement: pone.0134640.s003.pdf [file pone.0134640.s003.pdf]

**Supplementary Table S1**

Hybrid 2 showed the lowest EC50 values (indicating greatest potency) of all agonists tested for both TNF and IL-1 $\beta$  production in adult peripheral blood. The maximum cytokine responses achieved at higher agonist concentrations of Hybrid 2 (e.g., 10mM) was similar to those induced by R848, Meta-amine, and Para-amine.

**Hybrid-2**

| Concentration<br>[ $\mu$ M] | Newborn       |              | Adult         |              |
|-----------------------------|---------------|--------------|---------------|--------------|
|                             | TNF- $\alpha$ | IL-1 $\beta$ | TNF- $\alpha$ | IL-1 $\beta$ |
| 0.01                        | 193.14        | 15.63        | 23.44         | 15.63        |
| 0.03                        | 189.84        | 15.63        | 102.83        | 15.63        |
| 0.1                         | 464.55        | 129.48       | 1427.29       | 37.42        |
| 0.3                         | 1998.77       | 437.70       | 6362.58       | 427.95       |
| 1                           | 3750.42       | 1169.67      | 14269.07      | 1061.65      |
| 10                          | 10395.78      | 1887.36      | 20983.61      | 2972.60      |

**Meta-amine**

| Concentration<br>[ $\mu$ M] | Newborn       |              | Adult         |              |
|-----------------------------|---------------|--------------|---------------|--------------|
|                             | TNF- $\alpha$ | IL-1 $\beta$ | TNF- $\alpha$ | IL-1 $\beta$ |
| 0.01                        | 79.15         | 15.63        | 23.44         | 15.63        |
| 0.03                        | 78.72         | 15.63        | 23.44         | 15.63        |
| 0.1                         | 94.65         | 15.63        | 20.83         | 15.63        |
| 0.3                         | 93.72         | 15.63        | 214.57        | 15.63        |
| 1                           | 1779.40       | 271.87       | 3739.68       | 232.86       |
| 10                          | 32214.43      | 6199.29      | 19087.54      | 2699.66      |

**Para-amine**

| Concentration<br>[ $\mu$ M] | Newborn       |              | Adult         |              |
|-----------------------------|---------------|--------------|---------------|--------------|
|                             | TNF- $\alpha$ | IL-1 $\beta$ | TNF- $\alpha$ | IL-1 $\beta$ |
| 0.01                        | 64.05         | 15.63        | 23.44         | 15.63        |
| 0.03                        | 120.31        | 15.63        | 121.74        | 15.63        |
| 0.1                         | 70.49         | 15.63        | 856.34        | 15.63        |
| 0.3                         | 381.52        | 15.63        | 3653.12       | 15.63        |
| 1                           | 1780.16       | 387.41       | 6740.50       | 419.70       |
| 10                          | 16542.73      | 2820.52      | 18165.00      | 2008.09      |

**R848**

| Concentration<br>[ $\mu$ M] | Newborn       |              | Adult         |              |
|-----------------------------|---------------|--------------|---------------|--------------|
|                             | TNF- $\alpha$ | IL-1 $\beta$ | TNF- $\alpha$ | IL-1 $\beta$ |
| 0.01                        | 95.80         | 15.63        | 23.44         | 15.63        |
| 0.03                        | 84.29         | 15.63        | 23.44         | 15.63        |
| 0.1                         | 68.30         | 46.36        | 284.13        | 14.94        |
| 0.3                         | 210.98        | 15.63        | 549.52        | 15.63        |
| 1                           | 654.85        | 415.65       | 3939.41       | 191.49       |
| 10                          | 1574.58       | 322.08       | 19454.73      | 1922.12      |
